# Supplementary material for: Elevated C-Reactive Protein Levels Modify the Effect of Magnesium on Depressive Symptoms: A Population-Based Study
Source: MDPI journal article supplement (doi:10.3390/nu15071560), 2023-03-23
Supplement: s1 [file s1]

**Table S1. Characteristics of included and excluded samples**

| Variable                           | Total sample<br>N (%) | Included sample<br>Mean $\pm$ SD | Excluded sample<br>Mean $\pm$ SD | Standardized mean<br>difference <sup>1</sup> |
|------------------------------------|-----------------------|----------------------------------|----------------------------------|----------------------------------------------|
| <b>Depression</b>                  | 4,210 (91.22)         | 0.35 $\pm$ 0.69                  | 0.36 $\pm$ 0.68                  | 0.02                                         |
| <b>Serum Mg (mg/dL)</b>            | 2,649 (57.40)         | 2.14 $\pm$ 0.19                  | 2.15 $\pm$ 0.20                  | 0.07                                         |
| <b>Age</b>                         | 4,615 (100.00)        | 53.39 $\pm$ 17.36                | 52.62 $\pm$ 18.64                | −0.04                                        |
|                                    |                       | <b>n (%)</b>                     | <b>n (%)</b>                     |                                              |
| <b>Depression</b>                  |                       |                                  |                                  |                                              |
| <2                                 | 3,925 (93.23)         | 2,051 (93.40)                    | 1,874 (93.05)                    | 0.01                                         |
| $\geq 2$                           | 285 (6.77)            | 145 (6.60)                       | 140 (6.95)                       |                                              |
| <b>CRP (mg/L)</b>                  |                       |                                  |                                  |                                              |
| <5                                 | 2,405 (89.94)         | 1,976 (89.98)                    | 429 (89.75)                      | 0.03                                         |
| $\geq 5$                           | 269 (10.06)           | 220 (10.02)                      | 49 (10.25)                       |                                              |
| <b>Sex</b>                         |                       |                                  |                                  |                                              |
| Women                              | 2,322 (50.31)         | 1,127 (51.32)                    | 1,195 (49.40)                    | 0.04                                         |
| Men                                | 2,293 (49.69)         | 1,069 (48.68)                    | 1,224 (50.60)                    |                                              |
| <b>Education level</b>             |                       |                                  |                                  |                                              |
| None                               | 491 (10.66)           | 209 (9.52)                       | 282 (11.71)                      | 0.16                                         |
| Below SHS                          | 2,082 (45.21)         | 936 (42.62)                      | 1,146 (47.57)                    |                                              |
| SHS                                | 1,190 (25.84)         | 585 (26.64)                      | 605 (25.11)                      |                                              |
| Above SHS                          | 842 (18.28)           | 466 (21.22)                      | 376 (15.61)                      |                                              |
| <b>Income level</b>                |                       |                                  |                                  |                                              |
| No income                          | 1,040 (23.89)         | 533 (24.27)                      | 507 (23.49)                      | 0.14                                         |
| NT\$20,000 and below               | 1,774 (40.74)         | 842 (38.34)                      | 932 (43.19)                      |                                              |
| NT\$20,001–50,000                  | 1,101 (25.29)         | 569 (25.91)                      | 532 (24.65)                      |                                              |
| NT\$50,001–70,000                  | 279 (6.41)            | 153 (6.97)                       | 126 (5.84)                       |                                              |
| NT\$70,001 and above               | 160 (3.67)            | 99 (4.51)                        | 61 (2.83)                        |                                              |
| <b>Physical activity status</b>    |                       |                                  |                                  |                                              |
| No                                 | 1,909 (47.11)         | 978 (44.54)                      | 931 (50.16)                      | 0.12                                         |
| Yes–walking                        | 1,139 (28.11)         | 615 (28.01)                      | 524 (28.23)                      |                                              |
| Yes–more than walking <sup>2</sup> | 1,004 (24.78)         | 603 (27.46)                      | 401 (21.61)                      |                                              |
| <b>Alcohol use</b>                 |                       |                                  |                                  |                                              |
| Non-drinker                        | 2,277 (53.54)         | 1,186 (54.01)                    | 1,091 (53.04)                    | 0.02                                         |
| Former drinker                     | 348 (8.18)            | 178 (8.11)                       | 170 (8.26)                       |                                              |
| Current drinker                    | 1,628 (38.28)         | 832 (37.89)                      | 796 (38.70)                      |                                              |
| <b>Smoking status</b>              |                       |                                  |                                  |                                              |
| Non-smoker                         | 2,674 (64.53)         | 1,493 (67.99)                    | 1,181 (60.63)                    | 0.17                                         |
| Former smoker                      | 501 (12.09)           | 272 (12.39)                      | 229 (11.76)                      |                                              |
| Current smoker                     | 969 (23.38)           | 431 (19.63)                      | 538 (27.62)                      |                                              |
| <b>Diabetes mellitus</b>           |                       |                                  |                                  |                                              |
| No                                 | 3,971 (90.77)         | 2,007 (91.39)                    | 1,964 (90.13)                    | 0.04                                         |
| Yes                                | 404 (9.23)            | 189 (8.61)                       | 215 (9.87)                       |                                              |
| <b>Hypertension</b>                |                       |                                  |                                  |                                              |
| No                                 | 3,311 (75.75)         | 1,665 (75.82)                    | 1,646 (75.68)                    | 0.00                                         |
| Yes                                | 1,060 (24.25)         | 531 (24.18)                      | 529 (24.32)                      |                                              |
| <b>Kidney disease</b>              |                       |                                  |                                  |                                              |
| No                                 | 4,275 (97.96)         | 2,156 (98.18)                    | 2,119 (97.74)                    | 0.03                                         |
| Yes                                | 89 (2.04)             | 40 (1.82)                        | 49 (2.26)                        |                                              |

CRP: C-reactive protein; SD: standard deviation; SE: standard error; SHS: senior high school; Mg: magnesium; \* $p < 0.05$ .

<sup>1</sup> Standardized difference = difference in means or proportions divided by the standard error.

<sup>2</sup> Physical activities considered as more than walking included running, hiking, folk dancing, aerobic dancing, swimming, and bicycling.

**Table S2. Odds ratios and estimates of depression according to serum Mg and CRP levels, NAHSIT 2005–2008**

| Variable                       | Depression (continuous variable) <sup>1</sup> |         |                | Depression (binary variable) <sup>2</sup> |         |              |
|--------------------------------|-----------------------------------------------|---------|----------------|-------------------------------------------|---------|--------------|
|                                | $\beta$                                       | p value | 95% CI         | OR                                        | p value | 95% CI       |
| <i>Crude</i>                   |                                               |         |                |                                           |         |              |
| Serum Mg (mg/dL)               | −0.26                                         | 0.001*  | (−0.41, −0.11) | 0.32                                      | 0.008*  | (0.14, 0.74) |
| CRP $\geq$ 3 mg/L <sup>3</sup> | 0.04                                          | 0.249   | (−0.03, 0.12)  | 1.54                                      | 0.033*  | (1.04, 2.28) |
| <i>Model 1</i>                 |                                               |         |                |                                           |         |              |
| Serum Mg (mg/dL)               | −0.24                                         | 0.003*  | (−0.39, −0.08) | 0.35                                      | 0.018*  | (0.15, 0.83) |
| CRP $\geq$ 3 mg/L              | 0.09                                          | 0.018*  | (0.02, 0.17)   | 1.93                                      | 0.002*  | (1.17, 2.94) |
| <i>Model 2</i>                 |                                               |         |                |                                           |         |              |
| Serum Mg (mg/dL)               | −0.23                                         | 0.004*  | (−0.39, −0.07) | 0.37                                      | 0.021*  | (0.16, 0.86) |
| CRP $\geq$ 3 mg/L              | 0.09                                          | 0.019*  | (0.02, 0.17)   | 1.91                                      | 0.003*  | (1.26, 2.90) |

CI: confidence interval; CRP: C-reactive protein; Mg: magnesium; \*p < 0.05.

<sup>1</sup> Depression score ranges from 0 to 4.

<sup>2</sup> Depression status was categorized into two groups based on the scores on BSRS-5: (1) depression score < 2, and (2) depression score  $\geq$  2.

<sup>3</sup> Reference group was CRP < 3 mg/L.

Model 1 adjusted for age, sex and BMI.

Model 2 adjusted for statistically significant variables (p < 0.05) in the univariate analysis (Table 1).

**Table S3. Odds ratios and estimates of depression according to serum Mg levels by CRP levels, NAHSIT 2005–2008**

| Variable                                                      | Depression (continuous variable) <sup>1</sup> |         |                | Depression (binary variable) <sup>2</sup> |         |              |
|---------------------------------------------------------------|-----------------------------------------------|---------|----------------|-------------------------------------------|---------|--------------|
|                                                               | $\beta$                                       | p value | 95% CI         | OR                                        | p value | 95% CI       |
| <b>Subgroup analysis (among CRP <math>\geq</math> 3 mg/L)</b> |                                               |         |                |                                           |         |              |
| <i>Crude</i>                                                  |                                               |         |                |                                           |         |              |
| Serum Mg (mg/dL)                                              | −0.46                                         | 0.008*  | (−0.79, −0.12) | 0.21                                      | 0.026*  | (0.05, 0.83) |
| <i>Model 1</i>                                                |                                               |         |                |                                           |         |              |
| Serum Mg (mg/dL)                                              | −0.41                                         | 0.022*  | (−0.75, −0.06) | 0.21                                      | 0.033*  | (0.05, 0.88) |
| <i>Model 2</i>                                                |                                               |         |                |                                           |         |              |
| Serum Mg (mg/dL)                                              | −0.38                                         | 0.037*  | (−0.73, −0.03) | 0.23                                      | 0.047*  | (0.05, 0.98) |
| <b>Subgroup analysis (among CRP &lt; 3 mg/L)</b>              |                                               |         |                |                                           |         |              |
| <i>Crude</i>                                                  |                                               |         |                |                                           |         |              |
| Serum Mg (mg/dL)                                              | −0.18                                         | 0.041*  | (−0.36, −0.00) | 0.46                                      | 0.149   | (0.16, 1.32) |
| <i>Model 1</i>                                                |                                               |         |                |                                           |         |              |
| Serum Mg (mg/dL)                                              | −0.16                                         | 0.066   | (−0.34, 0.01)  | 0.45                                      | 0.148   | (0.16, 1.33) |
| <i>Model 2</i>                                                |                                               |         |                |                                           |         |              |
| Serum Mg (mg/dL)                                              | −0.16                                         | 0.071   | (−0.34, 0.01)  | 0.46                                      | 0.154   | (0.15, 1.34) |

CI: confidence interval; CRP: C-reactive protein; Mg: magnesium; \*p < 0.05.

<sup>1</sup> Depression score ranges from 0 to 4.

<sup>2</sup> Depression status was categorized into two groups based on the scores on BSRS-5: (1) depression score < 2 and (2) depression score  $\geq$  2.

Model 1 adjusted for age, sex and BMI.

Model 2 adjusted for statistically significant variables (p < 0.05) in the univariate analysis (Table 1).

**Table S4. Odds ratios and estimates of depression according to serum Mg and CRP levels by sex, NAHSIT 2005–2008**

| Variable                               | Depression (continuous variable) <sup>1</sup> |         |                | Depression (binary variable) <sup>2</sup> |         |              |
|----------------------------------------|-----------------------------------------------|---------|----------------|-------------------------------------------|---------|--------------|
|                                        | $\beta$                                       | p value | 95% CI         | OR                                        | p value | 95% CI       |
| <b>Subgroup analysis (among men)</b>   |                                               |         |                |                                           |         |              |
| <i>Crude</i>                           |                                               |         |                |                                           |         |              |
| Serum Mg (mg/dL)                       | −0.37                                         | <0.001* | (−0.59, −0.16) | 0.24                                      | 0.016*  | (0.08, 0.77) |
| CRP $\geq$ 5 mg/L <sup>3</sup>         | 0.09                                          | 0.205   | (−0.05, 0.22)  | 1.45                                      | 0.293   | (0.73, 2.91) |
| <i>Model 1</i>                         |                                               |         |                |                                           |         |              |
| Serum Mg (mg/dL)                       | −0.37                                         | <0.001* | (−0.58, −0.15) | 0.25                                      | 0.020*  | (0.08, 0.81) |
| CRP $\geq$ 5 mg/L                      | 0.12                                          | 0.087   | (−0.02, 0.25)  | 1.64                                      | 0.133   | (0.81, 3.32) |
| <i>Model 2</i>                         |                                               |         |                |                                           |         |              |
| Serum Mg (mg/dL)                       | −0.38                                         | <0.001* | (−0.59, −0.16) | 0.25                                      | 0.019*  | (0.08, 0.80) |
| CRP $\geq$ 5 mg/L                      | 0.12                                          | 0.074   | (−0.01, 0.26)  | 1.75                                      | 0.126   | (0.85, 3.57) |
| <b>Subgroup analysis (among women)</b> |                                               |         |                |                                           |         |              |
| <i>Crude</i>                           |                                               |         |                |                                           |         |              |
| Serum Mg (mg/dL)                       | −0.12                                         | 0.300   | (−0.34, 0.10)  | 0.51                                      | 0.281   | (0.15, 1.73) |
| CRP $\geq$ 5 mg/L                      | 0.09                                          | 0.200   | (−0.05, 0.23)  | 2.10                                      | 0.022*  | (1.11, 3.95) |
| <i>Model 1</i>                         |                                               |         |                |                                           |         |              |
| Serum Mg (mg/dL)                       | −0.09                                         | 0.418   | (−0.32, 0.13)  | 0.53                                      | 0.323   | (0.15, 1.88) |
| CRP $\geq$ 5 mg/L                      | 0.16                                          | 0.030*  | (0.02, 0.31)   | 2.58                                      | 0.006*  | (1.32, 5.05) |
| <i>Model 2</i>                         |                                               |         |                |                                           |         |              |
| Serum Mg (mg/dL)                       | −0.07                                         | 0.550   | (−0.29, 0.16)  | 0.59                                      | 0.421   | (0.16, 2.14) |
| CRP $\geq$ 5 mg/L                      | 0.15                                          | 0.050*  | (−0.00, 0.29)  | 2.42                                      | 0.010*  | (1.23, 4.74) |

CI: confidence interval; CRP: C-reactive protein; Mg: magnesium; OR: odds ratio; \*p &lt; 0.05.

<sup>1</sup> Depression score ranges from 0 to 4.<sup>2</sup> Depression status was categorized into two groups based on the scores on BSRS-5: (1) depression score < 2 and (2) depression score  $\geq$  2.<sup>3</sup> Reference group was CRP < 5 mg/L.

Model 1 adjusted for age, and BMI.

Model 2 adjusted for statistically significant variables (p &lt; 0.05) in univariate analysis (Table 1).

**Table S5. Odds ratios and estimates of depression according to serum Mg and CRP levels by sex, NAHSIT 2005–2008**

| Variable                               | Depression (continuous variable) <sup>1</sup> |         |                | Depression (binary variable) <sup>2</sup> |         |              |
|----------------------------------------|-----------------------------------------------|---------|----------------|-------------------------------------------|---------|--------------|
|                                        | $\beta$                                       | p value | 95% CI         | OR                                        | p value | 95% CI       |
| <b>Subgroup analysis (among men)</b>   |                                               |         |                |                                           |         |              |
| <i>Crude</i>                           |                                               |         |                |                                           |         |              |
| Serum Mg (mg/dL)                       | −0.37                                         | <0.001* | (−0.60, −0.16) | 0.23                                      | 0.009*  | (0.07, 0.74) |
| CRP $\geq$ 3 mg/L <sup>3</sup>         | 0.06                                          | 0.255   | (−0.04, 0.17)  | 1.21                                      | 0.304   | (0.67, 2.20) |
| <i>Model 1</i>                         |                                               |         |                |                                           |         |              |
| Serum Mg (mg/dL)                       | −0.36                                         | 0.001*  | (−0.58, −0.15) | 0.25                                      | 0.019*  | (0.08, 0.80) |
| CRP $\geq$ 3 mg/L                      | 0.11                                          | 0.056   | (−0.00, 0.21)  | 1.50                                      | 0.196   | (0.81, 2.80) |
| <i>Model 2</i>                         |                                               |         |                |                                           |         |              |
| Serum Mg (mg/dL)                       | −0.37                                         | <0.001* | (−0.59, −0.16) | 0.25                                      | 0.01*   | (0.08, 0.79) |
| CRP $\geq$ 3 mg/L                      | 0.11                                          | 0.046*  | (0.00, 0.22)   | 1.52                                      | 0.186   | (0.82, 2.83) |
| <b>Subgroup analysis (among women)</b> |                                               |         |                |                                           |         |              |
| <i>Crude</i>                           |                                               |         |                |                                           |         |              |
| Serum Mg (mg/dL)                       | −0.12                                         | 0.290   | (−0.34, 0.10)  | 0.50                                      | 0.268   | (0.15, 1.70) |
| CRP $\geq$ 3 mg/L                      | 0.01                                          | 0.892   | (−0.10, 0.11)  | 1.71                                      | 0.049*  | (1.00, 2.92) |
| <i>Model 1</i>                         |                                               |         |                |                                           |         |              |
| Serum Mg (mg/dL)                       | −0.10                                         | 0.396   | (−0.32, 0.13)  | 0.51                                      | 0.304   | (0.14, 1.83) |
| CRP $\geq$ 3 mg/L                      | 0.08                                          | 0.194   | (−0.01, 0.19)  | 2.23                                      | 0.008*  | (1.24, 4.02) |
| <i>Model 2</i>                         |                                               |         |                |                                           |         |              |
| Serum Mg (mg/dL)                       | −0.07                                         | 0.528   | (−0.30, 0.15)  | 0.58                                      | 0.401   | (0.16, 2.10) |
| CRP $\geq$ 3 mg/L                      | 0.07                                          | 0.246   | (−0.05, 0.18)  | 2.16                                      | 0.010*  | (1.20, 3.89) |

CI: confidence interval; CRP: C-reactive protein; Mg: magnesium; OR: odds ratio; \*p < 0.05.

<sup>1</sup> Depression score ranges from 0 to 4.

<sup>2</sup> Depression status was categorized into two groups based on the scores on BSRS-5: (1) depression score < 2 and (2) depression score  $\geq$  2.

<sup>3</sup> Reference group was CRP < 3 mg/L.

Model 1 adjusted for age, and BMI.

Model 2 adjusted for statistically significant variables (p < 0.05) in univariate analysis (Table 1).
